# Supplementary material
Source: publisher figshare collection journal article supplement (https://frontiersin.figshare.com/ndownloader/files/17380337)

**Supplementary Figure 2.** Risk of bias graph: review of authors’ judgements about each risk of bias item presented as percentages across all included randomized controlled studies.

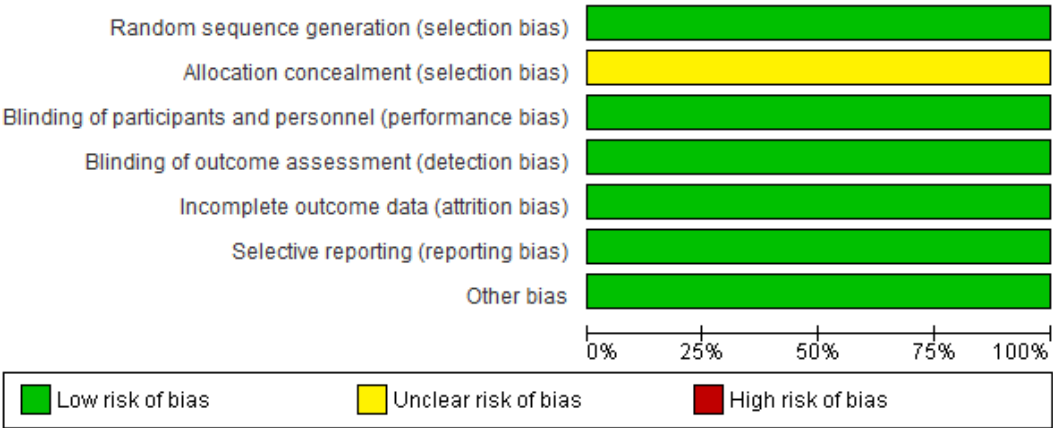

Supplement: Supplementary file [file 17380337]
